# Supplementary material for: 4D-imaging of drip-line radioactivity by detecting proton emission from 54mNi pictured with ACTAR TPC
Source: PubMed Central journal article supplement (PMC8355099; doi:10.1038/s41467-021-24920-0), 2021-08-10
Supplement: 41467_2021_24920_MOESM1_ESM.pdf [file 41467_2021_24920_MOESM1_ESM.pdf]

## Description of Additional Supplementary Figure

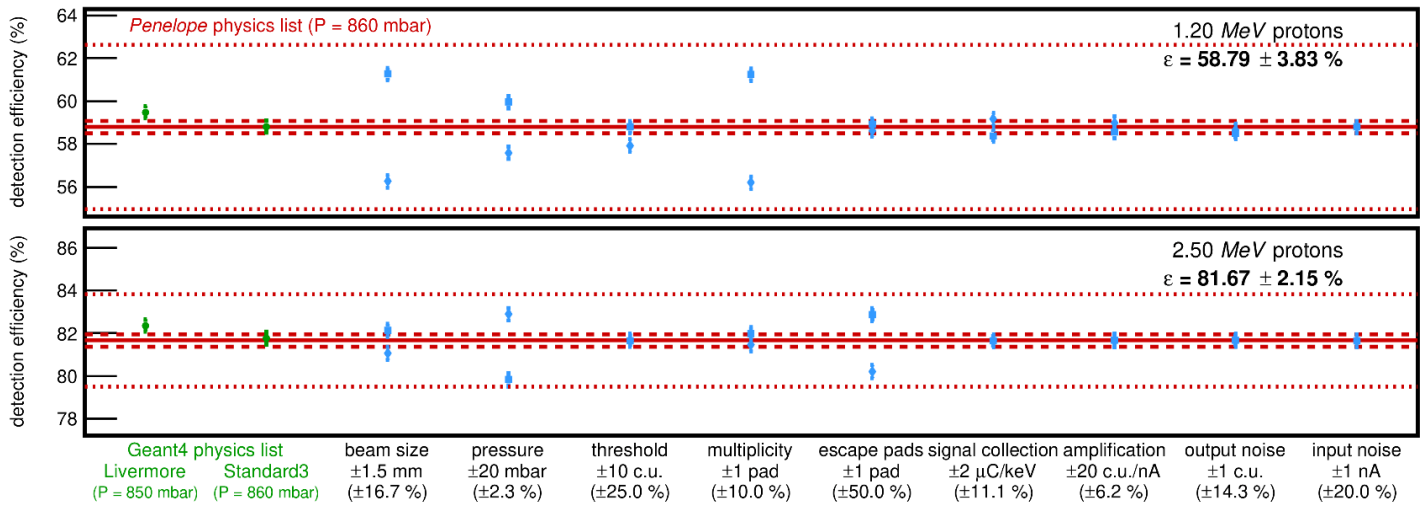

Supplementary Figure 1. Plot showing the contributions of simulation parameters to the uncertainties of the detection efficiencies
