# Supplementary material for: 4D-imaging of drip-line radioactivity by detecting proton emission from 54mNi pictured with ACTAR TPC
Source: PubMed Central journal article supplement (PMC8355099; doi:10.1038/s41467-021-24920-0), 2021-08-10
Supplement: 41467_2021_24920_MOESM3_ESM.pdf [file 41467_2021_24920_MOESM3_ESM.pdf]

## **Description of Additional Supplementary Files**

File Name: Supplementary Movie 1

Description: a movie showing the principle of the 3D+decay time imaging with ACTAR TPC.

File Name: Supplementary Movie 2

Description: a movie showing the experimental distributions construction with real events.
